# Supplementary material for: Selective Inflammatory Pain Insensitivity in the African Naked Mole-Rat (Heterocephalus glaber)
Source: PLOS journal article supplement (doi:10.1371/journal.pbio.0060013), 2008-01-24
Supplement: S4 (10.1371/journal.pbio.0060013.s004) [file journal.pbio.0060013.s004]

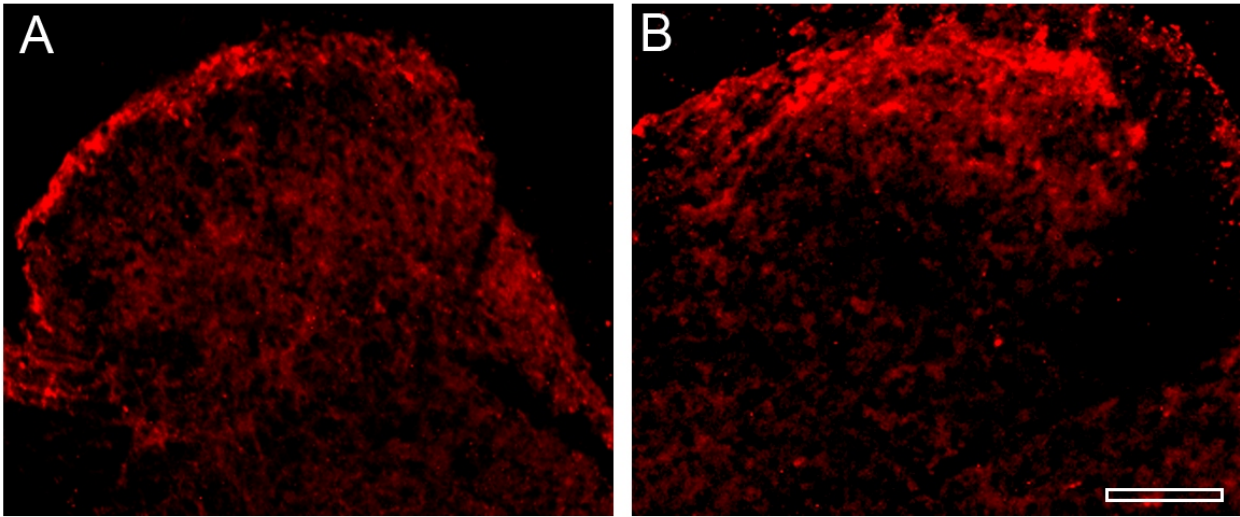

Park et al Supplementary Figure 4
